# Supplementary material for: The Development and Validation of the Perceived Competence Scale for Disaster Mental Health Workforce
Source: PubMed Central journal article supplement — Psychiatry Investig. 2019 Nov 15;16(11):816–28. doi: 10.30773/pi.2019.0140 (PMC6877459; doi:10.30773/pi.2019.0140), 2019-11-15
Supplement: pi-2019-0140-suppl1.pdf [file pi-2019-0140-suppl1.pdf]

**Supplementary Table 1.** Demographic data of respondents (N=509)

|                         | EFA (N=255) |      | CFA (N=254) |      |
|-------------------------|-------------|------|-------------|------|
|                         | Mean        | SD   | Mean        | SD   |
|                         | Frequency   | %    | Frequency   | %    |
| Age (mean, SD)          | 33.35       | 8.73 | 33.11       | 8.76 |
| Education (mean, SD)    | 17.16       | 1.83 | 17.2        | 1.63 |
| Sex                     |             |      |             |      |
| Male                    | 60          | 23.5 | 61          | 24   |
| Female                  | 192         | 75.3 | 191         | 75.2 |
| No response             | 3           | 1.2  | 2           | 0.8  |
| Age                     |             |      |             |      |
| 20 generations          | 111         | 43.5 | 112         | 44.1 |
| 30 generations          | 85          | 33.3 | 84          | 33.1 |
| 40 generations          | 39          | 15.3 | 38          | 15   |
| 50 generations upper    | 16          | 6.3  | 17          | 6.7  |
| No response             | 4           | 1.6  | 3           | 1.2  |
| Education               |             |      |             |      |
| Under graduated         | 16          | 6.3  | 11          | 4.3  |
| College graduate        | 60          | 23.5 | 63          | 24.8 |
| Master's student/MD     | 142         | 55.7 | 149         | 58.7 |
| Doctoral student/PhD    | 34          | 13.3 | 29          | 11.4 |
| No response             | 3           | 1.2  | 2           | 0.8  |
| Jobs                    |             |      |             |      |
| Medical doctor          | 21          | 8.2  | 21          | 8.3  |
| Psychologist            | 87          | 34.1 | 88          | 34.6 |
| Social worker           | 33          | 12.9 | 32          | 12.6 |
| Nurse                   | 61          | 23.9 | 62          | 24.4 |
| Under graduated student | 34          | 13.3 | 33          | 13.3 |
| Public servant          | 9           | 3.5  | 10          | 3.9  |
| Etc.                    | 5           | 2    | 5           | 2    |
| No response             | 5           | 2    | 1           | 0.4  |
| Duration of career      |             |      |             |      |
| None                    | 37          | 14.5 | 46          | 18.1 |
| <1 years                | 34          | 13.3 | 35          | 13.8 |
| 1-3 years               | 51          | 20   | 50          | 19.7 |
| 3-5 years               | 37          | 14.5 | 31          | 12.2 |
| 5-10 years              | 38          | 14.9 | 39          | 15.4 |
| >10 years               | 48          | 18.8 | 44          | 17.3 |
| No response             | 10          | 3.9  | 9           | 3.7  |
