# Supplementary material for: The Development and Validation of the Perceived Competence Scale for Disaster Mental Health Workforce
Source: PubMed Central journal article supplement — Psychiatry Investig. 2019 Nov 15;16(11):816–28. doi: 10.30773/pi.2019.0140 (PMC6877459; doi:10.30773/pi.2019.0140), 2019-11-15
Supplement: pi-2019-0140-suppl2.pdf [file pi-2019-0140-suppl2.pdf]

**Supplementary Table 2.** Result of items analysis of the disaster mental health competence scale (N=255)

| Subscales                        | No. | Mean (SD) |     |      |      | Skewness | Kurtosis | Corrected item-total correlation | Cronbach's alpha if item deleted |
|----------------------------------|-----|-----------|-----|------|------|----------|----------|----------------------------------|----------------------------------|
|                                  |     | Min       | Max | Mean | SD   |          |          |                                  |                                  |
| Competence in individual level   |     |           |     |      |      |          |          |                                  |                                  |
| 1. Knowledge                     |     |           |     |      |      |          |          |                                  |                                  |
| Understanding disaster           | 42  | 0         | 4   | 2.62 | 0.99 | -0.60    | 0.00     | 0.606                            | 0.951                            |
|                                  | 46  | 0         | 4   | 2.27 | 0.98 | -0.26    | -0.30    | 0.666                            | 0.951                            |
|                                  | 54  | 0         | 4   | 1.94 | 1.23 | 0.06     | -0.93    | 0.669                            | 0.951                            |
| Tailored support                 | 17  | 0         | 4   | 1.88 | 0.99 | -0.13    | -0.63    | 0.693                            | 0.950                            |
|                                  | 30  | 0         | 4   | 2.25 | 1.02 | -0.30    | -0.40    | 0.718                            | 0.950                            |
|                                  | 35  | 0         | 4   | 2.35 | 0.88 | -0.34    | 0.26     | 0.765                            | 0.950                            |
| 2. Skill                         |     |           |     |      |      |          |          |                                  |                                  |
| Problem solving                  | 9   | 0         | 4   | 1.94 | 0.94 | 0.15     | -0.30    | 0.717                            | 0.950                            |
|                                  | 15  | 0         | 4   | 2.08 | 0.87 | -0.19    | 0.12     | 0.675                            | 0.951                            |
|                                  | 31  | 0         | 4   | 2.09 | 0.87 | 0.01     | -0.32    | 0.752                            | 0.950                            |
| Communication                    | 5   | 0         | 4   | 2.05 | 0.92 | -0.08    | -0.10    | 0.712                            | 0.950                            |
|                                  | 14  | 0         | 4   | 2.26 | 0.87 | -0.36    | -0.11    | 0.726                            | 0.950                            |
|                                  | 45  | 0         | 4   | 2.31 | 0.93 | -0.15    | -0.21    | 0.699                            | 0.950                            |
| Information sharing              | 4   | 0         | 4   | 1.32 | 0.93 | 0.72     | 0.50     | 0.587                            | 0.951                            |
|                                  | 20  | 0         | 4   | 1.64 | 1.01 | 0.14     | -0.67    | 0.599                            | 0.951                            |
|                                  | 33  | 0         | 4   | 2.21 | 0.96 | -0.15    | -0.39    | 0.694                            | 0.950                            |
| 3. Attitude                      |     |           |     |      |      |          |          |                                  |                                  |
| Calling                          | 48  | 0         | 4   | 2.47 | 1.01 | -0.41    | -0.10    | 0.682                            | 0.950                            |
|                                  | 49  | 0         | 4   | 3.00 | 0.81 | -0.72    | 0.80     | 0.537                            | 0.952                            |
|                                  | 50  | 0         | 4   | 2.93 | 0.85 | -0.58    | 0.39     | 0.562                            | 0.952                            |
| Ethic                            | 12  | 0         | 4   | 3.20 | 0.85 | -1.18    | 1.67     | 0.444                            | 0.953                            |
|                                  | 37  | 1         | 4   | 3.23 | 0.77 | -0.74    | 0.04     | 0.389                            | 0.953                            |
|                                  | 53  | 0         | 4   | 3.50 | 0.75 | -1.74    | 3.71     | 0.395                            | 0.953                            |
| Qualification                    | 13  | 0         | 4   | 2.53 | 0.85 | -0.44    | 0.02     | 0.724                            | 0.950                            |
|                                  | 18  | 0         | 4   | 2.54 | 0.90 | -0.45    | 0.04     | 0.586                            | 0.951                            |
|                                  | 27  | 0         | 4   | 2.58 | 0.89 | -0.30    | -0.32    | 0.662                            | 0.951                            |
| Competence in organization level |     |           |     |      |      |          |          |                                  |                                  |
| 1. Team work                     |     |           |     |      |      |          |          |                                  |                                  |
| Cooperation                      | 35  | 0         | 4   | 3.01 | 0.74 | -0.61    | 0.88     | 0.741                            | 0.953                            |
|                                  | 23  | 0         | 4   | 2.84 | 0.74 | -0.55    | 0.70     | 0.785                            | 0.953                            |
|                                  | 39  | 1         | 4   | 2.98 | 0.69 | -0.26    | -0.07    | 0.733                            | 0.953                            |
| Organization communication       | 43  | 0         | 4   | 2.65 | 0.80 | -0.15    | -0.19    | 0.668                            | 0.954                            |
|                                  | 27  | 0         | 4   | 2.80 | 0.82 | -0.41    | 0.43     | 0.707                            | 0.954                            |
|                                  | 22  | 0         | 4   | 2.70 | 0.80 | -0.33    | 0.21     | 0.711                            | 0.954                            |
| Conflict management              | 33  | 0         | 4   | 2.68 | 0.84 | -0.33    | 0.16     | 0.736                            | 0.953                            |
|                                  | 32  | 0         | 4   | 2.74 | 0.79 | -0.45    | 0.16     | 0.786                            | 0.953                            |
|                                  | 17  | 0         | 4   | 2.77 | 0.73 | -0.29    | 0.33     | 0.678                            | 0.954                            |
| 2. Network                       |     |           |     |      |      |          |          |                                  |                                  |
| Disaster administration          | 28  | 0         | 4   | 2.36 | 1.02 | -0.20    | -0.38    | 0.713                            | 0.954                            |
|                                  | 24  | 0         | 4   | 2.50 | 1.03 | -0.39    | -0.30    | 0.704                            | 0.954                            |
|                                  | 31  | 0         | 4   | 2.58 | 0.92 | -0.40    | 0.00     | 0.767                            | 0.953                            |
| Linking local resources          | 21  | 0         | 4   | 2.00 | 1.06 | -0.03    | -0.73    | 0.594                            | 0.956                            |
|                                  | 37  | 0         | 4   | 2.08 | 0.96 | 0.01     | -0.27    | 0.605                            | 0.955                            |
|                                  | 3   | 0         | 4   | 2.52 | 0.91 | -0.53    | 0.23     | 0.708                            | 0.954                            |
| 3. Human resource management     |     |           |     |      |      |          |          |                                  |                                  |
| Leaderships                      | 34  | 0         | 4   | 2.62 | 0.82 | -0.25    | 0.04     | 0.769                            | 0.953                            |
|                                  | 40  | 1         | 4   | 2.81 | 0.75 | -0.12    | -0.38    | 0.752                            | 0.953                            |
|                                  | 18  | 1         | 4   | 2.74 | 0.72 | -0.13    | -0.21    | 0.720                            | 0.954                            |
| Followship                       | 5   | 0         | 4   | 3.09 | 0.78 | -0.80    | 0.87     | 0.692                            | 0.954                            |
|                                  | 2   | 0         | 4   | 2.90 | 0.75 | -0.45    | 0.42     | 0.610                            | 0.955                            |
|                                  | 4   | 0         | 4   | 3.24 | 0.80 | -1.22    | 2.34     | 0.613                            | 0.955                            |
| Additional items                 |     |           |     |      |      |          |          |                                  |                                  |
| Knowledge_preventing burnout     | 28  | 0         | 4   | 2.66 | 0.94 | -0.38    | -0.32    | 0.610                            | 0.951                            |
|                                  | 43  | 0         | 4   | 2.64 | 0.82 | -0.47    | 0.18     | 0.649                            | 0.951                            |
|                                  | 51  | 0         | 4   | 2.64 | 0.85 | -0.40    | 0.32     | 0.689                            | 0.951                            |
