# Supplementary material for: The Development and Validation of the Perceived Competence Scale for Disaster Mental Health Workforce
Source: PubMed Central journal article supplement — Psychiatry Investig. 2019 Nov 15;16(11):816–28. doi: 10.30773/pi.2019.0140 (PMC6877459; doi:10.30773/pi.2019.0140), 2019-11-15
Supplement: pi-2019-0140-suppl3.pdf [file pi-2019-0140-suppl3.pdf]

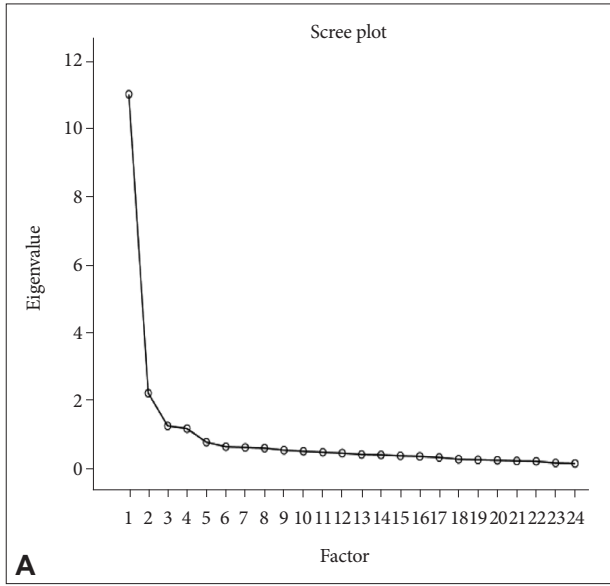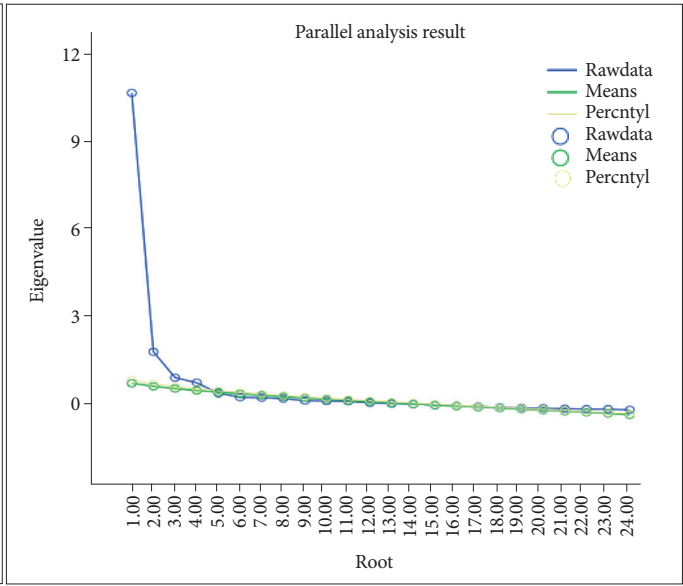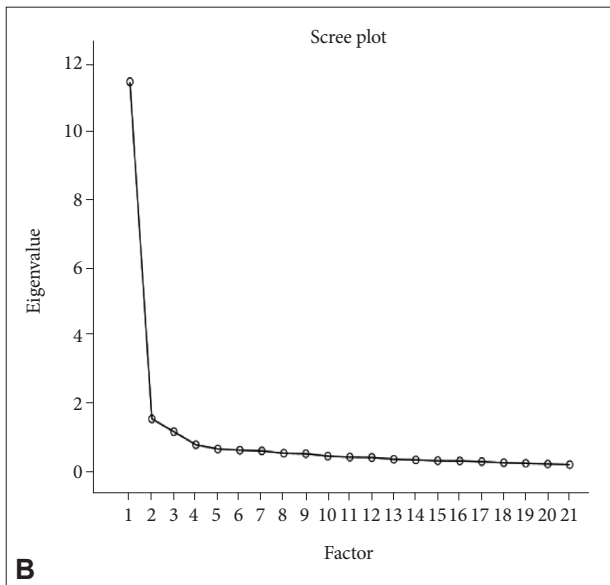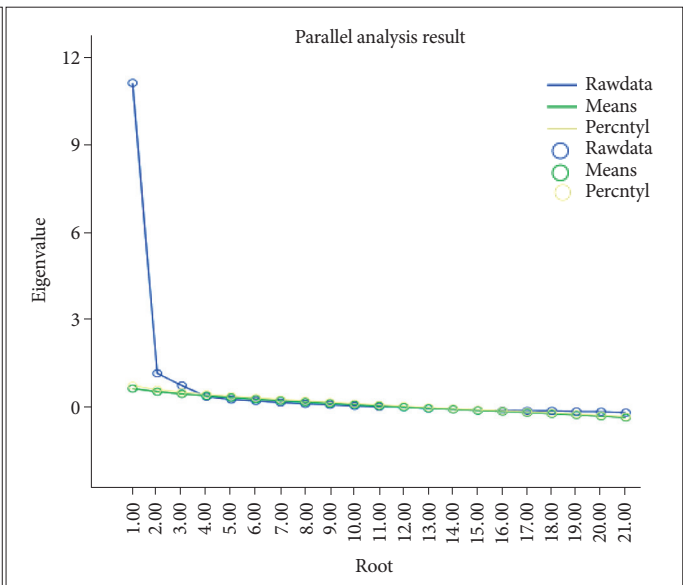

**Supplementary Figure 1.** Scree plot and result of parallel analyses in individual& organization competence (N=255). A: Individual competence. B: Organization competence.
